# Supplementary material for: Co2+/Co3+ratio dependence of electromagnetic wave absorption in hierarchical NiCo2O4–CoNiO2hybrids
Source: Royal Society of Chemistry journal article supplement (doi:10.1039/c5tc01716e), 2015-01-01
Supplement: c5tc01716e1.pdf [file c5tc01716e1.pdf]

# Supporting Information:

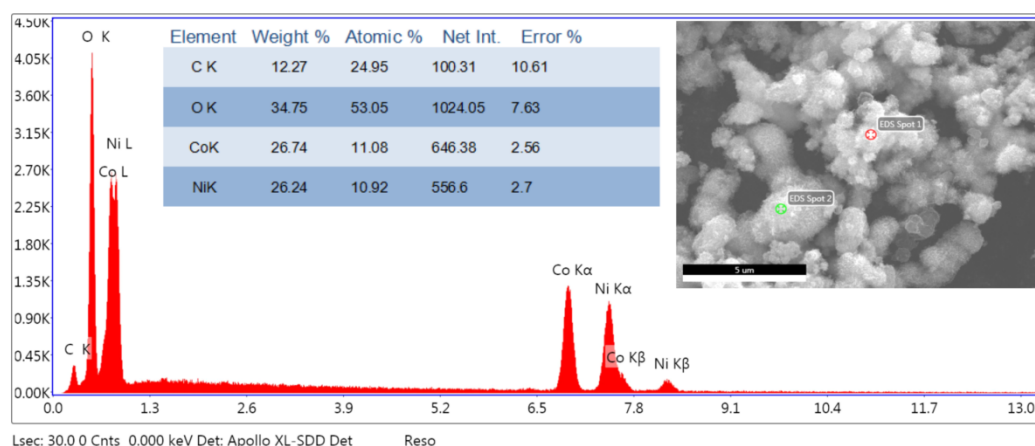

Fig. S1 EDX spectrum of the calcined  $\text{NiCo}_2\text{O}_4\text{-CoNiO}_2$  hybrid at 450 °C.
